# Supplementary material
Source: PubMed Central journal article supplement (PMC8083126)
Supplement: NIHMS1653482-supplement-4.pdf [file NIHMS1653482-supplement-4.pdf]

Supplementary table 3. Clinical and molecular demographics of all patients in the hospital-based cohort

| Arseniasis grade | Gender | Age | Smoking history  | CKD grade | ESRD    | Tumor location | Synchronous bladder cancer | Multiplicity | Tumor grade | Tumor stage | Aristolactam-DNA adducts | TP53 mutation pattern    |
|------------------|--------|-----|------------------|-----------|---------|----------------|----------------------------|--------------|-------------|-------------|--------------------------|--------------------------|
| 1                | M      | 50  | continued smoker | 5         | 1       | P              | no                         | no           | high        | TaN0M0      | yes                      | no mutation              |
| 1                | M      | 59  | continued smoker | 0         | 0       | LU             | no                         | no           | high        | T2N0M0      | yes                      | mutations other than A>T |
| 2                | F      | 46  | never            | 0         | 0       | P, LU          | yes                        | yes          | high        | T3N0M0      | yes                      | A>T mutation             |
| 1                | M      | 42  | continued smoker | 3         | 0       | P              | no                         | no           | high        | T3N0M0      | yes                      | no mutation              |
| 1                | M      | 53  | continued smoker | 0         | 0       | P, LU          | no                         | yes          | high        | T3N0M0      | yes                      | mutations other than A>T |
| 3                | M      | 63  | never            | 3         | 0       | UU             | no                         | no           | high        | TaN0M0      | yes                      | no mutation              |
| 1                | F      | 74  | never            | 3         | 0       | P              | no                         | no           | high        | T3N0M0      | yes                      | A>T mutation             |
| 1                | F      | 78  | never            | 3         | 0       | LU             | no                         | no           | high        | TaN0M0      | yes                      | A>T mutation             |
| 1                | F      | 70  | never            | 5         | 1       | P              | no                         | no           | high        | T1N0M0      | no                       | no mutation              |
| 1                | M      | 58  | never            | 3         | 0       | P              | no                         | no           | high        | T1N0M0      | yes                      | A>T mutation             |
| 1                | F      | 78  | never            | 0         | 0       | LU             | no                         | no           | high        | nodal       | yes                      | no mutation              |
| 1                | M      | 80  | continued smoker | 0         | 0       | P              | yes                        | yes          | low         | T1N0M0      | yes                      | no mutation              |
| 1                | F      | 56  | continued smoker | 0         | 0       | LU             | no                         | no           | high        | TaN0M0      | yes                      | A>T mutation             |
| 3                | M      | 66  | never            | 0         | 0       | P              | no                         | no           | low         | TaN0M0      | yes                      | A>T mutation             |
| 2                | F      | 66  | never            | 0         | 0       | P              | no                         | no           | low         | TaN0M0      | yes                      | no mutation              |
| 1                | M      | 73  | continued smoker | 3         | 0       | P              | no                         | no           | high        | T1N0M0      | yes                      | A>T mutation             |
| 0                | M      | 77  | ex-smoker        | 4         | 0       | LU             | yes                        | no           | high        | T3N0M0      | yes                      | mutations other than A>T |
| 0                | M      | 63  | never            | 1         | 0       | P              | yes                        | yes          | high        | T1N0M0      | yes                      | no mutation              |
| 1                | F      | 46  | never            | 2         | 0       | P, UU, LU      | yes                        | yes          | high        | T3N0M0      | yes                      | A>T mutation             |
| 0                | F      | 59  | never            | 2         | 0       | P              | no                         | no           | low         | TaN0M0      | yes                      | no mutation              |
| 0                | F      | 56  | never            | 1         | 0       | P              | no                         | no           | low         | TaN0M0      | yes                      | no mutation              |
| 0                | M      | 81  | never            | 3         | 0       | LU             | no                         | no           | high        | T1N0M0      | yes                      | mutations other than A>T |
| 0                | M      | 46  | never            | 2         | 0       | P              | no                         | no           | high        | T3N0M0      | yes                      | no mutation              |
| 0                | F      | 81  | never            | 5         | 0       | LU             | no                         | no           | high        | T3N0M0      | yes                      | mutations other than A>T |
| 0                | F      | 43  | never            | 5         | 0       | P, UU, LU      | yes                        | yes          | high        | T1N0M0      | yes                      | A>T mutation             |
| 0                | F      | 84  | never            | 3         | 0       | P              | yes                        | yes          | low         | TaN0M0      | yes                      | no mutation              |
| 0                | F      | 56  | never            | 0         | 0       | P              | no                         | no           | high        | nodal       | yes                      | A>T mutation             |
| 0                | F      | 68  | never            | 3         | 0       | P              | no                         | no           | low         | TaN0M0      | yes                      | no mutation              |
| 0                | F      | 70  | never            | 5         | 1       | P, LU          | no                         | yes          | high        | T3N0M0      | yes                      | A>T mutation             |
| 0                | M      | 60  | continued smoker | 0         | 0       | P, UU          | no                         | yes          | high        | T3N0M0      | yes                      | A>T mutation             |
| 0                | M      | 57  | continued smoker | 0         | 0       | P              | no                         | no           | high        | T3N0M0      | yes                      | no mutation              |
| 0                | M      | 74  | continued smoker | 0         | 0       | P              | no                         | yes          | high        | TaN0M0      | yes                      | no mutation              |
| 0                | F      | 50  | never            | 3         | 0       | LU             | yes                        | yes          | high        | metastatic  | yes                      | mutations other than A>T |
| 0                | F      | 61  | never            | 0         | 0       | P, UU          | no                         | yes          | high        | T1N0M0      | yes                      | mutations other than A>T |
| 0                | F      | 56  | never            | 5         | 1       | P              | no                         | no           | high        | T1N0M0      | yes                      | A>T mutation             |
| 0                | F      | 57  | never            | 0         | 0       | UU             | no                         | no           | high        | T3N0M0      | yes                      | mutations other than A>T |
| 0                | F      | 52  | never            | 5         | 1       | P              | no                         | no           | high        | T1N0M0      | yes                      | A>T mutation             |
| 0                | F      | 73  | continued smoker | 0         | 0       | P              | no                         | no           | high        | TaN0M0      | yes                      | no mutation              |
| 0                | F      | 77  | never            | 0         | 0       | P, UU          | no                         | yes          | low         | TaN0M0      | yes                      | no mutation              |
| 0                | M      | 54  | continued smoker | 0         | 0       | P, UU          | no                         | yes          | high        | T1N0M0      | yes                      | no mutation              |
| 0                | F      | 77  | never            | 3         | 0       | P              | no                         | no           | high        | nodal       | yes                      | no mutation              |
| 0                | M      | 70  | never            | 3         | 0       | LU             | yes                        | no           | high        | T1N0M0      | yes                      | A>T mutation             |
| 0                | M      | 79  | never            | 3         | 0       | P              | no                         | no           | high        | metastatic  | yes                      | no mutation              |
| 0                | F      | 59  | never            | 0         | 0       | P              | no                         | no           | low         | TaN0M0      | yes                      | no mutation              |
| 0                | F      | 65  | never            | 3         | 0       | P, UU          | yes                        | yes          | high        | T1N0M0      | yes                      | A>T mutation             |
| 0                | F      | 79  | never            | 3         | 0       | P              | no                         | no           | high        | TaN0M0      | yes                      | mutations other than A>T |
| 0                | F      | 71  | never            | 3         | 0       | LU             | yes                        | yes          | high        | T2N0M0      | yes                      | mutations other than A>T |
| 0                | F      | 72  | never            | 4         | 0       | P              | no                         | no           | low         | T1N0M0      | yes                      | A>T mutation             |
| 0                | M      | 60  | never            | 0         | 0       | P              | no                         | no           | high        | nodal       | yes                      | mutations other than A>T |
| 0                | F      | 67  | never            | 5         | 1       | P, UU          | yes                        | yes          | high        | T1N0M0      | no                       | missing                  |
| 0                | M      | 79  | never            | 3         | 0       | P              | no                         | no           | high        | T3N0M0      | yes                      | no mutation              |
| 0                | M      | 71  | never            | 0         | 0       | P              | no                         | no           | high        | nodal       | yes                      | missing                  |
| 0                | M      | 80  | never            | 3         | 0       | P, UU          | no                         | yes          | high        | nodal       | yes                      | A>T mutation             |
| 0                | M      | 81  | never            | 3         | 0       | P              | no                         | no           | high        | T1N0M0      | yes                      | no mutation              |
| 0                | F      | 41  | never            | 0         | 0       | P              | no                         | no           | high        | T3N0M0      | yes                      | no mutation              |
| 0                | M      | 82  | never            | 0         | 0       | LU             | no                         | no           | high        | T2N0M0      | yes                      | no mutation              |
| 0                | F      | 72  | never            | 3         | 0       | P              | no                         | no           | high        | metastatic  | yes                      | missing                  |
| 0                | F      | 80  | never            | 3         | 0       | LU             | no                         | no           | high        | T2N0M0      | yes                      | no mutation              |
| 0                | M      | 71  | never            | 3         | 0       | LU             | no                         | no           | high        | T1N0M0      | yes                      | no mutation              |
| 0                | M      | 47  | never            | 3         | 0       | P              | no                         | no           | high        | T3N0M0      | yes                      | A>T mutation             |
| 1                | M      | 62  | never            | 3         | 0       | P, UU, LU      | yes                        | yes          | high        | T3N0M0      | yes                      | missing                  |
| 1                | F      | 76  | never            | 3         | 0       | P              | no                         | no           | high        | T3N0M0      | yes                      | no mutation              |
| 1                | M      | 35  | never            | 3         | 0       | P              | no                         | no           | high        | T3N0M0      | yes                      | no mutation              |
| 1                | F      | 70  | never            | 3         | 0       | P              | no                         | no           | low         | TaN0M0      | yes                      | no mutation              |
| 2                | F      | 77  | never            | 4         | 0       | P              | yes                        | yes          | high        | T3N0M0      | yes                      | A>T mutation             |
| 2                | M      | 85  | never            | 4         | 0       | P              | no                         | no           | high        | T1N0M0      | yes                      | mutations other than A>T |
| 1                | F      | 75  | never            | 3         | 0       | LU             | no                         | no           | high        | T3N0M0      | yes                      | A>T mutation             |
| 2                | F      | 73  | never            | 0         | 0       | P              | no                         | no           | high        | T3N0M0      | yes                      | no mutation              |
| 1                | F      | 66  | never            | 0         | 0       | P              | yes                        | yes          | high        | T3N0M0      | yes                      | A>T mutation             |
| 1                | M      | 69  | never            | 0         | 0       | P              | no                         | no           | high        | nodal       | yes                      | mutations other than A>T |
| 1                | F      | 68  | never            | 3         | 0       | P              | no                         | no           | high        | T2N0M0      | yes                      | A>T mutation             |
| 3                | M      | 72  | never            | missing   | missing | P              | no                         | no           | high        | T1N0M0      | yes                      | mutations other than A>T |
| 3                | F      | 53  | never            | 5         | 1       | P              | no                         | no           | high        | T2N0M0      | yes                      | A>T mutation             |
| 3                | M      | 81  | continued smoker | 3         | 0       | P              | yes                        | yes          | high        | T1N0M0      | yes                      | no mutation              |
| 3                | M      | 66  | never            | 0         | 0       | UU             | no                         | yes          | high        | T1N0M0      | yes                      | no mutation              |
| 3                | M      | 49  | continued smoker | 0         | 0       | P              | no                         | yes          | high        | T1N0M0      | yes                      | missing                  |
| 3                | F      | 67  | never            | 0         | 0       | P, UU          | yes                        | yes          | high        | nodal       | yes                      | mutations other than A>T |
| 3                | M      | 64  | never            | 4         | 0       | P              | no                         | no           | high        | T1N0M0      | yes                      | A>T mutation             |
| 3                | F      | 79  | never            | 3         | 0       | LU             | no                         | no           | high        | T2N0M0      | no                       | no mutation              |
| 3                | F      | 78  | never            | 3         | 0       | P              | no                         | no           | high        | T2N0M0      | yes                      | no mutation              |
| 3                | M      | 71  | never            | 3         | 0       | P              | no                         | yes          | high        | T1N0M0      | yes                      | mutations other than A>T |
| 3                | F      | 65  | never            | 3         | 0       | LU             | no                         | no           | high        | T3N0M0      | yes                      | missing                  |
| 3                | M      | 72  | never            | 0         | 0       | P              | yes                        | yes          | low         | TaN0M0      | no                       | no mutation              |
| 3                | M      | 70  | never            | 5         | 1       | P, UU          | no                         | yes          | high        | T2N0M0      | yes                      | no mutation              |
| 3                | F      | 78  | never            | 3         | 0       | P              | no                         | no           | high        | T1N0M0      | yes                      | no mutation              |
| 3                | F      | 62  | never            | 0         | 0       | LU             | no                         | no           | high        | nodal       | yes                      | no mutation              |
| 3                | F      | 63  | never            | 0         | 0       | P              | no                         | yes          | high        | TaN0M0      | yes                      | no mutation              |
| 3                | M      | 58  | never            | 0         | 0       | UU             | no                         | no           | high        | T2N0M0      | yes                      | A>T mutation             |
| 3                | F      | 80  | never            | 0         | 0       | P              | yes                        | yes          | high        | T3N0M0      | yes                      | no mutation              |

CKD = chronic kidney disease; ESRD = end stage renal disease

\*Tumor location: P = renal pelvis, UU = upper ureter, LU = lower ureter
